# Supplementary material for: Multiple genes contribute to anhydrobiosis (tolerance to extreme desiccation) in the nematode Panagrolaimus superbus
Source: PubMed Central journal article supplement (PMC5738622; doi:10.1590/1678-4685-gmb-2017-0030), 2017-11-06
Supplement: 1415-4757-gmb-1678-4685-GMB-2017-0030-Suppl01.pdf [file 1415-4757-gmb-1678-4685-GMB-2017-0030-Suppl01.pdf]

## Supplementary Material to “Multiple genes contribute to anhydrobiosis (tolerance to extreme desiccation) in the nematode *Panagrolaimus superbus*”

**Table S1** - Nucleotide sequences of primers. pDNR-LibT7 primers were used to amplify kinase genes cloned in the pDNR-library. These amplicons contained T7 promoters at each end. Primers: actin, PER, GP114, si46, si76 and si86, were used for knockdown confirmation via RT-PCR. Primers 1 to 21 were used to clone the corresponding *P. superbus* sequences (see Table 1) via RT-PCR. Primers “All T7::primers from 1 – 21” were used to produce the corresponding amplicons with T7 promoters at each end.

| Targets                     | strand  | sequence (5'-3')                                        |
|-----------------------------|---------|---------------------------------------------------------|
| pDNR-LibT7                  | forward | <u>GGTAATACGACTCACTATAG</u> ATACATTATACGAAGTTATCA       |
|                             | reverse | <u>GGTAATACGACTCACTATAG</u> ATGACCATGTTCACTTACCTA       |
| actin                       | forward | GCCGGGCTTGATGAAAATTCT                                   |
|                             | reverse | TGTCGGCAATACCAGGATACA                                   |
| PER                         | forward | CACATCCTGCACATTTTACGC                                   |
|                             | reverse | TGCAACGAATCAAGGACTCTG                                   |
| GP114                       | forward | CGGCATGTTTGATTGTGGCAT                                   |
|                             | reverse | TTTGTGGGCAGCTATCCTTT                                    |
| si46                        | forward | AAACTTCTGCTGAATCGTGGG                                   |
|                             | reverse | AGAAACAGTTGAGACACCAGG                                   |
| si76                        | forward | GCAACTGATACAGCTCTTCG                                    |
|                             | reverse | TTGAACTGCTGTTCTACCTGG                                   |
| si86                        | forward | GGGGCCAATTGTATCAAGATC                                   |
|                             | reverse | AAAAAAATCACATAAAAGAGTCAGA                               |
| 1                           | forward | GGTTTTAGAGGGTGCCATGTA                                   |
|                             | reverse | AGTTTATGATTTCCCAAAGCC                                   |
| 2                           | forward | AGTTTGTCAATACTGATTCTCC                                  |
|                             | reverse | GCAGGTGTTGACCACTCATT                                    |
| 3                           | forward | GGGTGTTGGAGATATGTTCTG                                   |
|                             | reverse | ATATAAGTCAACAACAAAACGATT                                |
| 4                           | forward | GGGTACTAAAGATGGGACAGA                                   |
|                             | reverse | AAGAAGAGTTTTTCCAGTGCCA                                  |
| 6                           | forward | GGGGAATTAATTGATCGAGGG                                   |
|                             | reverse | GATTTAAGCATGCTGGGATCAA                                  |
| 7                           | forward | ACTAAAATGATTAAGCTGGAAT                                  |
|                             | reverse | ATGTTGCAGATGAAAGAGGTAC                                  |
| 8                           | forward | GTTGCTTGGAAATCCTGTTGAT                                  |
|                             | reverse | AAAGGAGATTAACAGCCATATC                                  |
| 9                           | forward | GTCTTTGCTGGTGTGGTGAA                                    |
|                             | reverse | GAGAAACGAATTTGCCTTGATG                                  |
| 10                          | forward | GGGGATCATTATTGACTTTTTATT                                |
|                             | reverse | AGATACAAAGAAACCCCGATAAA                                 |
| 11                          | forward | TGTCTTCGACGAGATATTTCTG                                  |
|                             | reverse | TTTGCGACTAATTCATTTATTCATA                               |
| 15                          | forward | GTAAATCAGCATCGAGGAATC                                   |
|                             | reverse | GAATGAATTTATGAACGATGGCT                                 |
| 16                          | forward | AAGATGGCACGTCGTTATGAC                                   |
|                             | reverse | CAGAAGAAGTTTCGCATCAAGA                                  |
| 17                          | forward | GGGGAATTCAGTATTTTACCTC                                  |
|                             | Reverse | GAGTTCTGGAACATTCCTCACT                                  |
| 21                          | Forward | TTATTTGTTTTGTGTAATTTCTTC                                |
|                             | Reverse | CAGAGAGAAATTAATTTGGCTTC                                 |
| All T7::primers from 1 - 21 | Forward | Add at 5': <u>GGTAATACGACTCACTATAG</u> -primer sequence |
|                             | Reverse | Add at 5': <u>GGTAATACGACTCACTATAG</u> -primer sequence |
