# Supplementary material for: Multiple genes contribute to anhydrobiosis (tolerance to extreme desiccation) in the nematode Panagrolaimus superbus
Source: PubMed Central journal article supplement (PMC5738622; doi:10.1590/1678-4685-gmb-2017-0030), 2017-11-06
Supplement: 1415-4757-gmb-1678-4685-GMB-2017-0030-Suppl02.pdf [file 1415-4757-gmb-1678-4685-GMB-2017-0030-Suppl02.pdf]

## Supplementary Material to “Multiple genes contribute to anhydrobiosis (tolerance to extreme desiccation) in the nematode *Panagrolaimus superbus*”

**Table S2** - Nucleotide sequences of all dicer substrates.

| code    | target                                                      | Strand    | Sequence (5'-3')             |
|---------|-------------------------------------------------------------|-----------|------------------------------|
| GFP     | Green Fluorescent Protein (control)                         | sense     | GCGUUCAAUUAGCAGACCAUUAUCAAC  |
|         |                                                             | antisense | UGAUAAUGGUCUGCUAAUUGAACGCUU  |
| si23    | Pinin/SDK/memA/ protein conserved region containing protein | sense     | GGUGCACGAGAUCCGCUAAUGUUUGGU  |
|         |                                                             | antisense | CAAACAUUAGGCGAUCUCGUGCACCAU  |
| si24    | glutamate dehydrogenase                                     | sense     | ACUUCAAACUGUAUCUACUUAAUGAC   |
|         |                                                             | antisense | CAUUAAGUAGAUACAGUUUGAAGUUC   |
| si25    | cathepsin L-like cysteine proteinase                        | sense     | GGAUCUCUUGAAGGACAACAUAACGU   |
|         |                                                             | antisense | GUUUAUGUUGCCUUAAGAGAUCGGG    |
| si26    | A - heat shock protein 70                                   | sense     | UUCGAUCAUUUUUACAUUUAAUUAUUU  |
|         |                                                             | antisense | AUAUUAAAUGUAAAAAAUGAUCGAAUG  |
| si27/28 | B/C - Heat shock 70 kDa protein                             | sense     | CUGCCAGGACUUGCUUCUUCUUGAUG   |
|         |                                                             | antisense | UCAAGAAGAAGCAAGCUGGACGAAU    |
| si29    | Ras-related protein Rab-1A                                  | sense     | CUGGUGGCUGCUGCUAAAUAUCAUUU   |
|         |                                                             | antisense | UUGAUAAUUUAGCAGCACCAGUUU     |
| si30    | Ras-related protein Rab-11B                                 | sense     | GGUGCCCUUCUUGUCUACGAUAUUGGU  |
|         |                                                             | antisense | CAAUAUCGUAGACAAGAAGGGCACCAA  |
| si31    | cuticle collagen protein LON-3                              | sense     | AGAUGGGCAAGGUGCUGAAGAUUUAC   |
|         |                                                             | antisense | AAUAUCUUCAGCACCUUGCCCAUCUUU  |
| si32    | CBR-RPS-0 protein (40S ribosomal protein AS)                | sense     | UGGGCUGCUUCAUCUUGGGAUAAUACU  |
|         |                                                             | antisense | UAUUAUCCCAAGAUGAAGCAGCCAAU   |
| si33    | Immunodominant antigen Ov33-3 / Pepsin inhibitor Dit33      | sense     | AACAACAAGUUAAGAAUUAUUUGGUG   |
|         |                                                             | antisense | CCAAAUAUUUUUUAACUUGUUGUGA    |
| si34    | Ubiquitin-conjugating enzyme H1                             | sense     | GUUGGGCUGCUUCUCUUUCUUCUGUA   |
|         |                                                             | antisense | CGAAGAGAAAGAGAAGCAGCCCAACGA  |
| si35    | histone H2B 2                                               | sense     | UGCUGCUGUUGAUGAUGUUGUAAAUGU  |
|         |                                                             | antisense | AUUUACAACAUCAUCAACAGCAGCAA   |
| si36    | cytochrome P450 like_TBP                                    | sense     | UCAGAGCACUGGGCAGAAUACACAAU   |
|         |                                                             | antisense | UUGUGAUUUCUGCCAGUGCUCUGAAU   |
| si37    | CRE-RPL-9 protein                                           | sense     | CGUCAUGCUUCAUGGAUUUAAACCCGU  |
|         |                                                             | antisense | GGGUUAAAUCUUAAGAAGCAUGACGAA  |
| si38    | ribosomal protein L44                                       | sense     | ACAGGGCUCAUCAUGGUUAAUGUACUU  |
|         |                                                             | antisense | GUACAUUAACCAUGAUGAGCCUGUUU   |
| si39    | A - euk. Transl. Elong. factor 1A                           | sense     | UCUGGAUUCAAUGGCGAUAACACUCUU  |
|         |                                                             | antisense | GCAUGUUUUCGCAUUGAUAUCAGAGA   |
| si40    | B - euk. Transl. Elong. factor 1A                           | sense     | UAUUGCUCUCUGGAAAUUUGAAACUGC  |
|         |                                                             | antisense | AGUUUCAAAUUUCCAGAGAGCAAUAUC  |
| si41    | Elongation factor 1 beta                                    | sense     | CUGCUGGAGGUGAUGAUGACUUUGAUU  |
|         |                                                             | antisense | UCAAGUCAUCAUCACCUCAGCAGCU    |
| si42    | DNA repair protein RAD51 homolog 1 (4e-110)                 | sense     | ACUGGGAGCUUGACUGAAAUAUUUGGU  |
|         |                                                             | antisense | CAAAUAUUUCAGUCAAGCUCUCCAGUUU |
| si43    | Pv-hsp60                                                    | sense     | AUGGGUGGUGGCAUGUUCUAAAUGUG   |
|         |                                                             | antisense | CAUUUUAGAACAUGCCACCACCCAUAAC |
| si44    | Pv-p23                                                      | sense     | AUUGGUUGAAAAGUUUAGUUUAAAGAU  |
|         |                                                             | antisense | CUUAAACUAAACUUUUUCAACCAAUUU  |
| si45    | putative heat shock protein 90                              | sense     | UUGUCCUCUCUUGCUGAUUAUGUUUGG  |
|         |                                                             | antisense | AAACAUAUUCAGCAAGAGAGGACAACU  |
| si46    | 60S ribosomal protein L4                                    | sense     | UGGUCGUGCCGUAGCUCGUAUUCUCG   |
|         |                                                             | antisense | AGGAAUACGAGCUACGGCACGACCAGU  |
| si47    | 40S ribosomal protein S8                                    | sense     | AAGGGUGCUAAGCUUAAUGAAGAAGAA  |
|         |                                                             | antisense | CUUCUUCAUUAAGCUUAGCACCCUUCU  |
| si48    | 60S ribosomal protein L7a                                   | sense     | AUCGUCCAGAAACCAAAACAACAAAAU  |
|         |                                                             | antisense | UUUUGUUGUUUGGUUCUGGACGAUUA   |
| si76    | oxidoreductase, aldo/keto reductase family protein          | sense     | AACAGAUUACAUGAUUUUAUUUUAAU   |
|         |                                                             | antisense | UAAAUAUAAAUCAUGUAAUCUGUUCG   |
| si77    |                                                             | sense     | UCCGCUGCUCUGUCUCUUUCUCUCCA   |

| code  | target                                                                                                                 | Strand    | Sequence (5'-3')             |
|-------|------------------------------------------------------------------------------------------------------------------------|-----------|------------------------------|
|       | zinc finger domain containing protein (AN1-like Zinc finger)                                                           | antisense | GAAGAGAAAGAGACAGAGCAGCGGAUG  |
| si78  | channel protein, MIP family; aquaporin                                                                                 | sense     | CUGCUGUCACCCUUGCCUCCUUGUUC   |
|       |                                                                                                                        | antisense | ACAAGGAAGGCAAGGGUGACAGCAGGA  |
| si79  | autophagy-related protein 2-like protein A                                                                             | sense     | GUACUUGCCUUUUUUUUUGUAAAAUUG  |
|       |                                                                                                                        | antisense | AAAUACAAAACAAUAAGGCAAGUACAA  |
| si80  | peptidyl-prolyl cis-trans isomerase domain containing protein; cyclophilin-type peptidyl-prolyl cis-trans isomerase-15 | sense     | AGGCUCCAGUCGAAUAAGUGCUUUACC  |
|       |                                                                                                                        | antisense | UAAAGCACUUAUUCGACUGGAGCCUUU  |
| si81  | chaperonin Cpn60 TCP-1 domain containing protein                                                                       | sense     | CUUCCCGGUGGUACUGUUAAGAUUCU   |
|       |                                                                                                                        | antisense | AAUCUUUAACAGUACCACCGGGAAGCU  |
| si82  | Derlin-2                                                                                                               | sense     | UUGCUUGCGGUCAUUUUGUAUUUUUCU  |
|       |                                                                                                                        | antisense | AAAUAUACAAAUGACCGCAAGCAAUU   |
| si83  | DJ-1                                                                                                                   | sense     | GACCCUUGCGAGACGAACUACAGCGAA  |
|       |                                                                                                                        | antisense | CGCUGUAGUUCGUCUCGCAAGGGCCA   |
| si84  | Ezrin Radixin Moesin family member (erm-1)                                                                             | sense     | CAAGCCCGUGUCCAAGAUGGUCUUAGU  |
|       |                                                                                                                        | antisense | UAAGACCAUCUUGGACACGGGCUUGAU  |
| si85  | HSP70 cochaperone BAG1                                                                                                 | sense     | ACAUGACUGCUGAAAUGAUUACACGAU  |
|       |                                                                                                                        | antisense | CGUGUAAUCAUUUCAGCAGUCAUGUCG  |
| si86  | LC3, GABARAP and GATE-16 family member (Igg-1)                                                                         | sense     | UGGACUCAACUCAGCAAAACGAUAACU  |
|       |                                                                                                                        | antisense | UUAUCGUUUUGCUGAGUUGAGUCCA    |
| si87  | ATP-dependent protease La; lon protease homolog, mitochondrial precursor                                               | sense     | UUGCAAUGACUGGUGAAAUUUCUUUAA  |
|       |                                                                                                                        | antisense | AAAGAAAUUUCACCAGUCAUUGCAACA  |
| si88  | isocitrate dehydrogenase, NADP-dependent                                                                               | sense     | GGCCGGGGCAUCUGGUUAUGAACAUUCG |
|       |                                                                                                                        | antisense | GAUGUUAUACCAAGAUCCCGGCCCGU   |
| si89  | prefoldin subunit 2, PFD-2                                                                                             | sense     | CUACCGACUUAGUGAUUUCUUAAGUAGA |
|       |                                                                                                                        | antisense | UACUAAGAUUACACUUAAGUCGGUAGAA |
| si90  | Probable E3 ubiquitin-protein ligase                                                                                   | sense     | GUGUCAGAGAACGGUAAAUCAUGAAA   |
|       |                                                                                                                        | antisense | UCAUUGAUUUACCGUUCUCUGACACCA  |
| si91  | Proteasome subunit alpha type 4                                                                                        | sense     | ACGCGGCACGAUAAUAAGACUGUCAUC  |
|       |                                                                                                                        | antisense | UGACAGUCUUUUUAUCGUGCCGCGUAA  |
| si92  | CRE-PBS-1 protein; proteasome domain containing protein                                                                | sense     | UCGGGAUCAAAUGAAUGCAAGUGUUAU  |
|       |                                                                                                                        | antisense | AACACUUGCAUUCAUUUUGAUCCCGAUA |
| si93  | Protein disulfide isomerase                                                                                            | sense     | AUAGUCGCAAAUAAAAUACAGUACCA   |
|       |                                                                                                                        | antisense | GUACUGUAUUUUAAUUUGCGCAGUAUUU |
| si94  | RIC1 Putative stress responsive protein                                                                                | sense     | UGAGUAUUGUAUUAAUGUUUAAAUA    |
|       |                                                                                                                        | antisense | UAUUUAAACAUUAAUACAAUACUCAA   |
| si95  | Small heat shock protein alpha crystallin family                                                                       | sense     | UUUCUUCUCAUCGCAUAAUAAUUAUUUU |
|       |                                                                                                                        | antisense | AAAUAUUAUUGCGAUGAGAAGAAAGU   |
| si96  | tetratricopeptide TPR-1 domain containing protein; hsp70-interacting protein, putative                                 | sense     | UGGCGGGUGGAAACAAUUCUGAAACAA  |
|       |                                                                                                                        | antisense | GUUUCAGAAUUGUUUCCACCCGCAUU   |
| si97  | THaumatIN family member                                                                                                | sense     | GGGUCGAACAGGGUGUGAUGACUCUU   |
|       |                                                                                                                        | antisense | GAGUCAUCACACCCUGUUCGAGCCCAA  |
| si98  | Ubiquitin conjugating enzyme (E2) family member (ubc-3)                                                                | sense     | AUGGAUGCUGAUGAAGAUUAAUUAUGAU |
|       |                                                                                                                        | antisense | CAUAAUAAUCUUAUCAGCAUCCAUA    |
| si99  | ubiquitin                                                                                                              | sense     | UGGCCGUACACUCUCUGAUUUAACA    |
|       |                                                                                                                        | antisense | GUUAUAAUCAGAGAGUGUACGGCCAUC  |
| si100 | ubiquitin-activating enzyme E1                                                                                         | sense     | AUCUUCGUGCUGCAAAUUAUGAUUCA   |
|       |                                                                                                                        | antisense | AUAUCAUAAUUUGCAGCACGAAGAUUU  |
