# Supplementary material for: Multiple genes contribute to anhydrobiosis (tolerance to extreme desiccation) in the nematode Panagrolaimus superbus
Source: PubMed Central journal article supplement (PMC5738622; doi:10.1590/1678-4685-gmb-2017-0030), 2017-11-06

## Supplementary Material to “Multiple genes contribute to anhydrobiosis (tolerance to extreme desiccation) in the nematode *Panagrolaimus superbus*”

**Figure S2** - Gel densitometry. Worms were soaked in solutions containing 1  $\mu$ M of siRNA against GFP (siGFP, the control group) or against the *ifb-1* gene (si-*ifb1*). Left: total RNA was extracted and RT-PCR was performed to amplify target gene (*ifb-1*, the thinner band) and the endogenous control ( *$\beta$ -actin*). Right: gel densitometry using the software ImageJ.

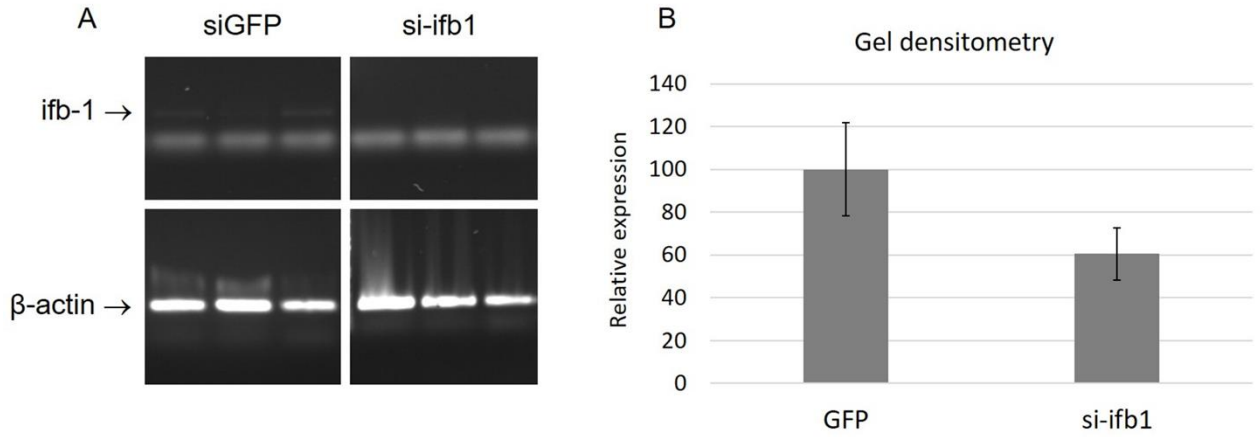

Supplement: 1415-4757-gmb-1678-4685-GMB-2017-0030-Suppl04.pdf [file 1415-4757-gmb-1678-4685-GMB-2017-0030-Suppl04.pdf]
